# Supplementary material for: A Novel E3-ubiquitin Ligase-Related LncRNA Signature for Predicting Prognosis in Patients with Lung Adenocarcinoma
Source: Research Square preprint supplement (doi:10.21203/rs.3.rs-1216648/v1), 2022-01-05
Supplement: Supplementary file 1 [file b85c0c05a52057095b614b66.xlsx]

## Sheet: Table1
Supplement Table1 The LUAD samples from The Cancer Genome Atlas (TCGA)
id	futime	fustat	ZNF571-AS1	TMPO-AS1	ZSCAN16-AS1	NR2F2-AS1	SCOC-AS1	PAN3-AS1	CYP1B1-AS1	FRMD6-AS1	riskScore	risk
TCGA-78-7535	2.6	1	1.32929	1.49661	2.04264	1.52772	1.64018	1.63278	1.05401	1.56844	0.881086	low
TCGA-49-6742	1.21918	0	0.7378	2.2647	1.914	1.92039	1.21542	1.68204	1.3264	1.67277	2.7891	high
TCGA-69-7760	0.553425	0	0.699577	1.40912	1.60062	1.57936	1.28993	1.60063	1.06472	1.56788	1.52151	high
TCGA-05-4405	1.67123	0	0.978387	1.08682	2.0112	1.69083	1.47	1.64361	1.35273	1.66236	0.753835	low
TCGA-78-8655	6.46575	0	0.854116	1.20917	1.95039	1.61514	1.58181	1.96592	1.19208	1.68079	0.619386	low
TCGA-55-8203	1.49863	0	0.84948	1.40644	2.13993	1.6145	1.34751	1.83081	1.106	1.58529	0.434085	low
TCGA-44-7659	1.21644	0	1.24143	1.25904	1.98575	1.81921	1.98455	2.1838	2.15371	2.0012	0.40337	low
TCGA-55-A4DG	1.66575	0	2.16785	1.01089	2.006	2.1453	2.16112	1.85041	1.84584	1.65513	1.17216	high
TCGA-86-8054	2.0411	0	0.744118	1.42235	2.01972	1.55562	1.26696	1.54968	1.04649	1.67702	1.07814	high
TCGA-38-4629	2.36712	1	0.675644	1.36049	2.00599	1.72069	1.36043	1.51448	0.982927	1.81346	3.85253	high
TCGA-78-7147	1.60548	1	1.31758	1.58803	2.21089	1.65793	1.51353	1.56555	1.5367	1.65097	0.506129	low
TCGA-55-8092	0.421918	1	0.981928	1.35639	2.21697	2.56066	1.62962	1.93009	1.12235	1.73936	14.0189	high
TCGA-44-5643	1.14247	0	0.678794	1.81996	1.89003	1.50843	1.27628	1.83935	1.00587	1.97461	1.42638	high
TCGA-49-AARQ	18.4438	0	2.00615	2.07504	2.43921	1.74036	1.22636	2.12562	1.14459	1.92745	0.131552	low
TCGA-55-8094	1.48219	0	0.795115	1.06535	1.93223	1.47683	1.33086	1.45761	1.28805	1.5172	0.490952	low
TCGA-49-AAR0	12.7534	0	0.928355	1.41122	2.27527	1.65097	1.57899	2.04226	1.2824	1.75167	0.385699	low
TCGA-69-7763	1.89041	0	0.805278	0.776543	2.08103	1.79033	1.40085	1.57087	1.15425	1.57025	1.10522	high
TCGA-86-8076	1.33973	0	0.904858	0.796154	2.01279	1.64889	1.57477	1.66818	1.22358	1.57111	0.736362	low
TCGA-44-4112	1.0137	0	1.07649	1.00776	1.93451	1.62831	1.3621	1.60319	1.935	1.6175	0.162052	low
TCGA-69-7765	0.452055	0	0.863485	0.911872	1.91843	1.79505	1.53312	1.73134	1.42024	1.59939	0.863955	low
TCGA-55-7281	2.38904	0	0.743211	0.961621	1.9927	1.59537	1.83936	1.51035	1.20211	1.52944	2.35321	high
TCGA-50-6597	3.47397	1	0.789536	0.780228	2.19058	1.70554	1.1765	1.47037	1.23607	1.59347	0.503888	low
TCGA-73-4677	0.10411	1	0.677879	0.697647	2.08082	1.56623	1.30506	1.51335	1.19222	1.56576	0.493444	low
TCGA-05-4434	1.25205	1	1.09967	1.51923	1.93238	1.8134	1.43748	1.82109	1.26538	1.80108	1.31955	high
TCGA-MP-A4SW	4.87123	1	1.15419	1.36825	1.84904	1.66524	1.81918	1.82953	1.14235	1.54983	1.481	high
TCGA-78-7633	2.72329	0	1.55367	0.880931	2.14326	1.70978	1.80958	1.45902	1.21122	1.53655	1.19958	high
TCGA-44-2659	1.44932	0	0.972485	0.891279	1.94186	1.7247	1.42272	1.69695	1.46203	1.68145	0.532813	low
TCGA-97-A4M0	1.7863	0	0.814345	1.1883	1.77712	1.72648	1.41178	1.85045	1.21369	1.64833	0.922031	low
TCGA-50-5068	4.10685	1	0.764944	0.988677	2.50234	2.05237	1.707	1.87218	1.23032	1.60691	1.62294	high
TCGA-86-A4P8	1.18082	0	1.05327	0.842449	1.99288	2.10163	1.58979	2.02461	1.38377	1.68482	1.10118	high
TCGA-86-A4D0	0.317808	1	0.758269	1.6552	2.07022	1.53411	1.34952	1.79037	0.957866	1.53995	0.642904	low
TCGA-55-8085	2.47671	0	0.86065	1.90784	2.24559	1.70775	1.46684	1.91942	1.23016	1.9418	1.22367	high
TCGA-50-5935	1.78904	1	1.05482	0.901107	2.09495	1.6597	1.36188	1.48647	1.223	1.623	0.666669	low
TCGA-53-7813	1.16164	0	1.02869	1.56825	2.03633	1.62558	1.46816	1.72845	1.09265	1.62515	0.933047	low
TCGA-62-8399	7.3863	0	2.77017	0.98723	1.92908	1.94091	1.24577	1.54516	1.90032	1.58695	0.0660112	low
TCGA-44-7671	1.46575	0	0.819216	0.489256	2.01604	1.64248	1.34445	1.42928	1.38018	1.58841	0.524257	low
TCGA-97-7552	5.29315	0	0.923107	0.97482	1.83255	1.73831	1.36579	1.73092	1.14683	1.66598	0.970215	high
TCGA-44-6145	0.89863	0	0.821318	1.28381	1.95323	1.77297	1.47575	1.48723	1.15333	1.59491	2.7503	high
TCGA-55-8204	1.41096	0	0.733005	1.31167	1.97263	1.65619	1.35541	1.56826	0.988839	1.92913	3.15178	high
TCGA-64-1676	4.73425	0	0.720528	0.956836	2.34031	1.59003	1.41348	1.53667	1.21642	1.69445	0.657623	low
TCGA-91-8496	1.38356	0	0.898282	0.716724	2.27206	1.65074	1.32402	1.76132	1.23167	1.57894	0.212517	low
TCGA-35-3615	0.0383562	0	0.824456	0.666573	2.40427	1.75562	1.44302	1.74381	1.12084	1.59574	0.459987	low
TCGA-55-8096	1.96986	1	1.19445	1.0699	2.04796	1.74684	1.40279	1.7774	1.18627	1.78045	0.682996	low
TCGA-67-6215	0.476712	0	0.822679	0.902977	1.86348	1.60541	1.50293	1.74083	1.12195	1.55074	0.731141	low
TCGA-53-A4EZ	2.93425	0	0.879007	1.2529	2.16408	1.56283	1.2141	1.79821	1.04054	1.57404	0.266741	low
TCGA-MP-A4SY	4.11233	1	1.0252	1.1103	1.72838	2.08967	1.4656	1.82596	1.66946	1.87164	2.00379	high
TCGA-73-4676	0.449315	0	1.4696	1.27044	1.90025	1.62493	1.53313	1.48985	1.70375	1.65788	0.447779	low
TCGA-44-6775	1.0137	0	0.943002	1.7648	1.91052	1.71517	1.4079	1.81262	1.13758	1.86891	1.88857	high
TCGA-44-3917	1.07397	0	2.52121	1.56324	1.77754	2.2491	2.38745	2.18644	1.42294	1.73266	4.03613	high
TCGA-69-8255	0.353425	0	1.52975	2.26407	2.06622	1.86136	1.4922	1.64592	0.996304	1.57299	2.65162	high
TCGA-73-7498	3.25753	0	0.939161	1.00384	2.14234	1.87803	1.71799	2.01075	1.28702	1.63281	0.849248	low
TCGA-78-7148	1.71507	1	0.727464	1.61488	1.832	1.76878	1.44832	1.43339	1.21005	1.60555	4.42451	high
TCGA-78-7152	3.29315	0	0.746968	0.929092	1.82224	1.51693	1.48391	1.53787	1.048	1.53984	1.16019	high
TCGA-44-A47A	1.27671	0	1.10037	1.4896	1.85377	1.61721	1.39794	1.90565	1.52653	1.81132	0.354869	low
TCGA-67-3773	1.16986	0	1.03826	1.17046	2.47372	1.79137	1.44387	2.09589	1.95221	1.70899	0.0614672	low
TCGA-50-6593	0.920548	1	0.744929	1.1052	2.01815	1.69579	1.51257	1.6177	1.32177	1.57881	1.04912	high
TCGA-38-A44F	0.364384	0	0.881717	1.1843	2.1485	1.90109	1.60496	2.08524	1.10057	1.80016	1.313	high
TCGA-50-6592	2.12877	1	1.45976	1.80328	1.76055	1.59548	1.32457	1.71441	1.109	1.82124	0.948206	low
TCGA-86-8278	1.30411	0	0.844409	1.00452	1.87976	1.58283	1.54386	1.9508	1.38694	1.64528	0.334646	low
TCGA-05-4250	0.331507	1	0.802176	1.24104	1.89229	1.68022	1.31179	1.49894	1.01932	1.88248	3.12319	high
TCGA-4B-A93V	0.69589	0	0.823991	1.22576	2.06266	1.53734	1.29265	1.66986	0.962369	1.52828	0.52035	low
TCGA-86-7713	1.15616	0	0.792763	1.40759	1.71383	1.56514	1.25641	1.47305	1.0194	1.53084	1.47404	high
TCGA-55-A48Y	1.72603	0	1.14903	1.27954	2.0435	1.63701	1.35509	1.55505	1.11619	1.67434	0.864491	low
TCGA-71-6725	0.70137	0	0.970917	1.15315	1.91695	1.51186	1.35049	1.57849	1.01971	1.53916	0.637997	low
TCGA-55-6642	6.70959	0	0.944689	1.10326	1.90841	1.59912	1.36615	1.77151	1.07754	1.62501	0.565469	low
TCGA-62-A472	2.49315	0	1.5114	1.54927	1.82794	1.91727	1.53394	1.81901	1.24627	1.7127	1.56406	high
TCGA-44-6146	0.827397	0	0.718674	1.09069	1.8039	1.64467	1.31026	1.65861	1.02926	1.57834	1.10018	high
TCGA-MP-A4SV	7.17808	1	1.15885	1.33675	1.85543	1.59089	1.3672	1.68559	1.39601	1.79281	0.55028	low
TCGA-49-AARN	3.10959	1	0.923218	1.31044	2.00026	1.82014	1.71418	1.80475	1.46683	1.75168	1.67091	high
TCGA-L9-A444	0.841096	0	1.23347	1.47493	1.89024	1.72239	1.39054	1.74453	1.41266	1.5829	0.483293	low
TCGA-55-8615	1.22192	0	1.05032	1.42716	2.06957	1.52999	1.36314	1.73394	1.03442	1.61513	0.480336	low
TCGA-44-5644	1.36438	0	2.63804	1.7997	1.87895	1.53969	1.16885	1.79429	1.00161	1.59876	0.0863613	low
TCGA-MP-A4TI	1.17534	1	0.880327	1.66782	1.92284	1.7198	1.57827	1.87529	1.12305	1.82565	2.28548	high
TCGA-05-4403	1.58356	0	0.701425	1.11989	1.99942	1.58533	1.1976	1.5522	1.03504	1.59684	0.751446	low
TCGA-44-2666	0.265753	1	2.55776	1.916	1.79357	3.30201	2.33345	2.36346	2.73329	2.85295	67.9426	high
TCGA-99-7458	1.07397	0	0.764422	1.00069	1.88904	1.82202	1.49502	1.74799	1.47986	1.81862	1.38404	high
TCGA-78-7145	2.26301	1	0.751138	1.10577	1.72618	1.56814	1.22739	1.41052	1.03516	1.5172	1.27928	high
TCGA-NJ-A4YP	0.136986	0	0.809828	1.24363	2.12815	1.56623	1.5292	1.86637	1.36352	1.61052	0.330852	low
TCGA-55-8208	1.84658	0	0.985647	1.22097	2.13368	1.67519	1.47794	1.92954	1.28199	1.73193	0.416753	low
TCGA-97-7941	1.32603	0	1.07234	1.3597	1.81771	2.15912	1.43313	1.85654	1.20587	1.74698	3.87543	high
TCGA-62-8397	3.53151	0	1.39331	1.35877	2.26847	1.83125	1.37145	1.63817	1.28817	1.62544	0.555084	low
TCGA-91-6830	0.164384	0	0.949941	1.55546	1.90591	2.10599	1.32133	1.75968	1.55411	1.70598	1.85839	high
TCGA-55-1592	1.92055	1	1.12118	1.14334	2.08242	1.79889	1.61645	1.84919	1.21417	1.66355	0.934871	low
TCGA-78-7537	4.44384	1	0.813012	0.969415	2.0276	1.55569	1.53746	1.56589	1.10687	1.55532	0.94882	low
TCGA-78-7166	0.706849	1	0.724852	1.56188	2.06189	1.81566	1.31116	1.57788	1.0109	1.5732	2.40449	high
TCGA-55-7995	2.43562	0	1.06708	1.83996	1.94838	1.69133	1.35574	1.85454	1.15406	1.6163	0.727446	low
TCGA-62-8395	3.33151	0	1.38568	0.915412	1.95144	1.73185	1.63492	1.59567	1.29138	1.56409	0.843346	low
TCGA-49-4494	2.96164	1	0.646391	1.27144	2.13068	1.55338	1.39421	1.38418	1.18896	1.71266	1.61177	high
TCGA-49-4501	3.89315	1	0.784761	0.805769	2.27729	1.73843	1.49199	1.60779	1.29809	1.63693	0.753878	low
TCGA-91-6847	2.30685	0	1.27237	1.90816	2.12847	1.59796	1.35685	2.00684	1.01015	2.01283	0.669992	low
TCGA-86-A4JF	1.46849	0	0.967154	1.1363	1.92067	1.5566	1.27632	1.47985	1.0719	1.55947	0.74435	low
TCGA-44-2668	0.673973	0	1.56899	1.56052	1.71213	1.6379	1.26747	1.64407	1.0804	1.91573	1.14435	high
TCGA-44-7660	0.890411	0	0.856639	2.02306	1.98276	1.6595	1.57391	2.11377	0.978508	2.38969	4.65487	high
TCGA-86-8279	1.32055	0	1.71188	1.44353	2.02189	1.63479	1.7129	1.65948	1.17789	1.65407	0.87077	low
TCGA-97-7937	1.54521	0	0.920546	1.24999	1.77212	1.70966	1.35002	1.7556	1.0783	1.58572	1.02161	high
TCGA-78-7542	0.879452	1	0.795725	1.1815	1.83547	1.65871	1.78259	1.50775	0.96192	1.90408	10.8332	high
TCGA-38-7271	2.19178	1	0.811749	0.916955	1.97598	1.69743	1.37108	1.66774	1.23013	1.55356	0.630833	low
TCGA-73-4658	4.38356	1	0.744903	0.920285	2.0618	1.69888	1.26796	1.58908	1.09309	1.5969	0.804771	low
TCGA-49-6743	1.01096	0	0.910069	1.92334	1.99172	1.6099	1.3744	1.51403	1.18929	1.62006	1.59778	high
TCGA-05-4425	1.83288	0	0.841323	1.34725	1.99618	1.64272	1.32467	1.55445	1.31428	1.60029	0.76992	low
TCGA-55-6986	8.93425	0	0.859207	0.940066	1.73298	1.59572	1.1688	1.8053	1.15667	1.53432	0.281974	low
TCGA-78-7220	2.21096	1	0.900318	2.0352	1.76306	1.99841	1.17153	1.46661	1.06099	1.52933	6.00294	high
TCGA-L9-A8F4	1.30411	0	1.40404	1.34764	1.84826	1.72446	1.47705	1.94174	1.31554	1.87316	0.600574	low
TCGA-50-5939	1.26027	1	0.75625	1.23081	1.99331	1.79349	1.60123	1.65669	1.08718	1.76609	3.91559	high
TCGA-55-8510	1.47671	0	1.19047	1.21143	1.91304	1.90427	1.69569	1.72712	1.4463	1.62705	1.65523	high
TCGA-38-6178	1.2274	0	1.00489	1.03451	1.99448	1.66976	1.44732	1.69001	1.15544	1.72071	0.89646	low
TCGA-MN-A4N4	3.21918	0	2.32147	1.30205	1.85572	1.73337	1.57549	1.55721	1.33574	1.7713	0.628571	low
TCGA-44-7662	0.59726	0	1.08169	1.27968	1.87442	1.80358	1.6735	1.70033	1.10016	1.73295	3.40486	high
TCGA-MP-A4T4	7.16986	1	1.16486	1.26805	1.9125	1.84206	1.42043	1.84376	1.1643	1.8165	1.29003	high
TCGA-95-A4VP	1.65753	0	0.783849	1.21938	2.17097	1.83184	1.30341	1.87987	1.2173	1.56336	0.488536	low
TCGA-55-8206	2.43288	0	1.01124	1.16404	2.12953	1.76175	1.29075	1.89162	1.60581	1.69935	0.191185	low
TCGA-86-8585	0.967123	0	1.64704	1.53505	2.0346	1.66582	1.9958	1.71443	1.07978	1.84273	3.20471	high
TCGA-44-7672	1.14521	0	0.790952	1.34662	2.0747	1.5824	1.47029	1.56969	1.09837	1.72146	1.53064	high
TCGA-NJ-A4YG	5.21644	0	1.10621	0.802747	2.03495	1.59907	1.57299	1.88333	2.03624	1.58095	0.0678347	low
TCGA-44-8117	1.05479	0	1.85868	1.09805	1.81062	1.78902	1.54648	1.57528	1.09932	1.95918	2.16433	high
TCGA-93-A4JO	0.090411	1	1.19148	1.24437	1.99005	1.77254	1.37545	1.78767	1.11632	1.66863	0.756931	low
TCGA-67-3774	1.05479	0	0.71864	0.689071	2.07852	1.77374	1.34931	1.69098	1.18322	1.55857	0.645706	low
TCGA-86-8358	1.78904	0	1.19803	2.60737	2.45774	1.63232	1.46909	2.05065	1.15438	1.88414	0.616734	low
TCGA-MP-A4T6	4.90411	1	1.37853	1.24017	2.12	1.59832	1.80568	1.79697	1.26885	1.8419	0.890351	low
TCGA-55-8514	1.42466	0	1.64218	0.547196	1.9407	1.646	1.36956	1.90706	1.05428	1.5172	0.122209	low
TCGA-50-5944	2.09315	0	0.85304	1.53049	2.19958	1.80714	1.35601	1.75516	1.46081	1.61287	0.569589	low
TCGA-44-A47B	0.786301	0	1.21494	1.34222	1.9103	1.63016	1.28952	1.7341	1.06236	1.64593	0.545789	low
TCGA-L4-A4E6	1.19178	0	0.968585	0.883524	2.18738	1.86146	1.76363	1.91188	1.41114	1.57638	0.704194	low
TCGA-49-4507	0.734247	1	1.24163	1.66283	2.26249	1.62788	1.58817	1.52776	0.96119	1.6953	1.9636	high
TCGA-38-4625	8.14521	0	0.914334	1.25811	2.06158	1.75252	1.26841	1.55297	1.29492	1.60711	0.802375	low
TCGA-64-1678	3.25753	0	0.685067	1.61183	2.1247	1.5136	1.19081	2.14596	0.974768	1.62703	0.179518	low
TCGA-95-7567	0.446575	0	0.81163	1.12777	1.83735	1.62565	1.38251	1.57921	1.0378	1.63328	1.48498	high
TCGA-97-8174	0.449315	1	0.983697	1.05514	2.32729	1.97786	1.73569	1.73175	1.21599	1.61536	2.16601	high
TCGA-55-8089	1.92329	1	0.821449	1.77625	1.84423	1.86013	1.72542	1.65914	1.18984	1.97548	13.7109	high
TCGA-55-6978	0.482192	1	0.795159	1.49944	1.8462	1.97085	1.39604	1.5542	1.01594	1.69417	7.66075	high
TCGA-78-7153	2.08219	0	0.721	1.17697	1.73336	1.53321	1.22175	1.37248	1.0699	1.54183	1.32109	high
TCGA-05-5715	0.169863	0	0.708248	1.05478	2.17254	1.53573	1.22099	1.65154	1.18699	1.62063	0.315594	low
TCGA-J2-A4AE	1.83836	0	1.12842	1.72198	2.1135	1.83538	1.72274	1.702	1.3763	1.55852	1.77789	high
TCGA-J2-8194	1.98356	0	0.806929	0.825625	2.20127	1.63663	1.363	1.71248	1.11878	1.58007	0.405819	low
TCGA-55-6712	0.468493	1	0.725078	1.26678	1.75751	1.66519	1.66483	1.45956	0.997186	1.8633	10.3554	high
TCGA-50-5049	5.87945	0	0.705906	1.24076	2.28536	1.69796	1.53021	1.67155	1.22562	1.61132	0.977918	high
TCGA-73-4666	2.19178	0	0.938142	1.7204	1.90367	1.53105	1.45335	1.73915	1.06135	1.86528	1.57802	high
TCGA-MP-A5C7	5.10137	0	0.971918	1.31999	2.27485	1.75095	1.70392	1.85382	1.23436	1.54438	0.77584	low
TCGA-55-7994	1.65205	0	1.03899	1.57644	1.85619	1.58015	1.34805	1.81001	1.29361	1.73501	0.528505	low
TCGA-95-7039	0.0931507	0	1.62092	1.67899	1.76737	1.66386	1.83964	1.78519	1.26524	1.58377	1.27814	high
TCGA-78-7156	2.67397	1	1.01126	1.15405	2.05142	1.77533	1.87894	1.73678	1.58542	1.6467	1.30672	high
TCGA-55-8299	1.28493	1	0.859474	1.44296	2.09472	1.82617	1.56019	1.86998	1.57513	1.7679	0.870649	low
TCGA-05-5428	1.83562	0	0.751281	0.973437	2.34682	1.79976	1.67331	1.7292	1.37304	1.5172	0.773744	low
TCGA-55-7724	1.93151	0	0.899393	1.64515	1.99543	1.86057	1.45667	1.9784	1.23593	1.74151	1.24511	high
TCGA-97-7938	0.0493151	1	2.13356	0.86322	1.86802	1.87954	1.32802	1.57303	1.46523	1.56084	0.243993	low
TCGA-05-4418	0.750685	1	0.714449	1.63108	2.01157	1.9692	1.29102	1.55415	1.09012	1.57366	3.94497	high
TCGA-44-2661	1.22192	0	0.926507	1.09894	2.31544	1.74988	1.50696	1.77736	1.2124	1.65054	0.629958	low
TCGA-99-8032	0.120548	0	0.783899	1.36877	2.0578	1.64516	1.44809	1.68508	1.05345	1.74576	1.55769	high
TCGA-97-A4M2	1.70959	0	1.29534	1.07826	2.06892	1.95932	1.58479	1.9839	2.15591	1.64408	0.149875	low
TCGA-L9-A743	1.81918	0	1.52483	1.20848	1.97532	1.70432	1.52058	1.79757	1.45997	1.55268	0.257988	low
TCGA-91-A4BC	0.120548	0	1.00378	1.65306	2.13253	1.81507	1.46341	2.11969	1.18871	1.91238	0.858625	low
TCGA-91-6829	3.44658	1	1.11346	1.40798	1.96985	1.94613	1.29553	1.58225	1.53445	1.80827	1.45668	high
TCGA-44-6779	1.36986	1	0.675134	1.14645	1.72958	1.64413	1.47294	1.56371	0.995955	1.61326	2.85892	high
TCGA-05-4398	3.92055	0	1.57082	1.0556	1.83451	1.60205	1.2994	1.68741	1.56776	1.62604	0.140577	low
TCGA-L4-A4E5	1.58356	0	1.12364	1.90904	1.79655	1.62458	1.31249	1.74373	1.55645	1.90503	0.72749	low
TCGA-55-6968	3.54247	1	0.893046	2.29556	2.05793	1.56107	1.57843	1.74785	0.998844	1.596	1.99189	high
TCGA-44-2655	1.57534	0	0.725014	0.707976	2.16109	1.67497	1.72555	1.50931	1.47211	1.59791	1.11032	high
TCGA-50-5941	1.55342	0	0.91181	1.36805	1.83951	1.58092	1.44106	1.60387	1.08052	1.75815	1.75012	high
TCGA-49-6767	1.85479	0	1.6618	1.44421	1.85975	1.54842	1.2645	1.56623	1.05445	1.77319	0.571652	low
TCGA-78-7162	8.68219	1	1.31435	0.928317	2.05964	1.75668	1.67421	1.60638	1.37094	1.56001	0.795274	low
TCGA-44-3918	0.539726	0	0.951219	1.08659	2.01106	1.63516	1.45085	1.6726	1.33964	1.84812	0.838043	low
TCGA-44-5645	1.04932	0	2.55548	1.4899	2.01048	3.14685	2.12999	2.43314	2.73105	2.08751	2.66963	high
TCGA-50-8457	2.13425	0	0.941572	0.985962	1.979	1.8321	1.41256	1.62173	1.42908	1.54999	0.776099	low
TCGA-49-AARE	3.36712	1	0.873125	2.24088	1.82699	1.59091	1.78255	1.99507	1.41069	1.79858	1.78945	high
TCGA-49-4487	2.34247	1	1.12052	1.61829	2.04846	1.57355	1.49754	1.45028	1.10492	1.63303	1.61787	high
TCGA-44-6774	0.989041	0	0.83627	1.12939	1.8676	1.65053	1.33563	1.72146	1.24523	1.71914	0.756576	low
TCGA-69-8253	1.16712	0	0.765771	0.823902	1.95637	1.54727	1.37194	1.85586	1.12179	1.56689	0.297831	low
TCGA-L9-A7SV	1.54795	0	1.53608	1.39999	2.06498	1.9412	1.61657	1.64427	1.66774	1.56402	0.74674	low
TCGA-97-8172	1.49315	0	1.1777	0.9636	1.96867	1.94938	1.48516	1.98845	1.17612	1.70187	0.846438	low
TCGA-55-7574	2.72603	1	1.09185	1.18222	1.98064	1.89562	1.56992	1.99821	1.40959	1.67764	0.679096	low
TCGA-55-8620	1.0274	1	1.61855	2.00079	2.38243	1.51802	1.58231	2.46081	0.97063	2.21969	0.233349	low
TCGA-55-7728	1.92877	0	1.06775	1.27587	2.06299	1.67084	1.624	2.03015	1.08296	1.69639	0.629049	low
TCGA-50-5066	2.5863	0	1.79247	1.29186	1.81144	1.87957	1.49262	1.62018	1.2156	1.67212	1.30284	high
TCGA-97-7554	2.12329	0	1.89541	0.934888	2.00278	1.61448	1.35536	1.57937	1.06558	1.58128	0.260781	low
TCGA-97-A4M6	1.55616	0	0.776858	1.18062	1.93182	1.85949	1.34882	2.08625	1.20116	1.66025	0.577834	low
TCGA-97-8171	1.55616	0	1.1401	1.21956	2.34908	1.63271	1.29584	1.91986	1.911	1.61395	0.0399611	low
TCGA-MP-A4T7	0.457534	1	0.708341	1.74551	1.94939	2.15456	1.35708	1.79504	1.13419	1.65187	5.71866	high
TCGA-55-8621	1.41096	0	1.01048	1.06937	2.02788	1.91148	1.49822	1.77674	1.15336	1.62505	1.43821	high
TCGA-71-8520	0.575342	1	1.14593	1.20057	1.90465	1.81566	1.71147	1.63561	1.30431	1.66326	2.38084	high
TCGA-L9-A443	0.528767	1	1.10511	0.857308	1.96691	2.02923	1.61966	1.85091	1.48727	1.72976	1.32918	high
TCGA-55-7573	1.33425	0	1.11419	1.19356	2.06139	1.91368	1.83729	1.8048	1.38067	1.6792	2.15255	high
TCGA-S2-AA1A	1.40548	0	0.888927	1.07212	2.07455	2.0752	1.47474	1.88822	1.15262	1.82431	2.70069	high
TCGA-MP-A4TE	2.45479	1	0.726597	1.40289	1.98681	1.51253	1.21867	1.56484	1.00151	1.58629	0.764235	low
TCGA-55-6543	1.19178	0	0.889736	0.971801	2.00551	1.67536	1.57798	1.65188	1.04754	1.63261	1.50945	high
TCGA-55-6980	5.77808	0	0.834501	0.929233	2.04414	1.75598	1.37912	1.63033	1.18592	1.68545	1.07583	high
TCGA-91-8497	1.18904	1	0.988017	1.21611	2.16234	1.81697	1.42261	1.93757	1.28912	1.76894	0.571327	low
TCGA-86-7953	1.61918	0	0.731919	1.84032	1.8582	1.54836	1.43019	1.53348	1.01809	1.64454	2.7398	high
TCGA-55-8616	0.131507	0	0.978702	0.786651	1.77431	1.65469	1.4681	1.63856	1.1731	1.54321	0.81347	low
TCGA-86-8055	0.339726	1	0.791115	1.27454	1.90283	1.92727	1.38667	1.62055	1.12771	1.86183	4.90755	high
TCGA-73-4668	1.27945	0	0.784468	0.91009	1.9497	1.66871	1.36951	1.61583	1.05297	1.61206	1.06516	high
TCGA-55-6982	2.72603	1	0.805807	1.26462	1.86651	1.6879	1.36535	1.59708	1.0785	1.74985	2.06537	high
TCGA-67-6217	1.15616	0	1.11799	0.862209	2.1477	1.75719	1.73857	1.75388	1.16491	1.62159	1.07186	high
TCGA-64-5774	6.9863	0	0.817887	1.90636	2.20629	1.49673	1.35888	1.71829	1.00106	1.88795	1.19854	high
TCGA-97-8177	1.36712	0	0.897502	0.951142	2.24915	1.72633	1.72003	1.6258	1.22379	1.5553	1.20838	high
TCGA-44-6777	2.70411	1	0.774457	0.883047	1.93234	1.7032	1.48724	1.49339	1.22	1.60738	1.63648	high
TCGA-55-7816	1.28219	1	1.17379	0.961466	1.95559	1.88173	1.68329	1.90486	1.19836	1.8094	1.65981	high
TCGA-05-4402	0.668493	1	0.884227	1.23037	1.95135	1.70037	1.32534	1.65096	1.1951	1.68996	0.986813	high
TCGA-50-8459	1.6137	0	0.763549	0.970242	2.01888	1.70807	1.4545	1.82714	1.02549	1.81973	1.30592	high
TCGA-NJ-A7XG	1.69041	0	0.750965	0.937425	2.00457	1.57632	1.56914	1.9729	1.1728	1.65388	0.436045	low
TCGA-64-5815	0.613699	0	1.20528	1.06324	1.93749	1.67666	1.36403	1.4999	1.08888	1.8038	1.44842	high
TCGA-86-8056	0.380822	0	0.930483	0.909912	1.96047	1.82704	1.32907	1.78923	1.51359	1.75999	0.507324	low
TCGA-78-7146	0.473973	1	0.885607	1.25337	1.66816	1.84478	1.53816	1.48102	1.05812	1.77641	9.16192	high
TCGA-91-8499	0.0986301	0	1.14412	1.94494	2.40618	1.64214	1.77121	1.92897	0.998708	2.03842	2.28748	high
TCGA-55-6970	1.27123	1	0.809176	1.13425	1.88703	1.73745	1.4489	1.57819	1.20898	1.54983	1.49153	high
TCGA-05-4420	2.49863	0	1.16973	1.83964	2.09978	1.60265	1.16427	1.82725	1.10863	1.72909	0.363768	low
TCGA-NJ-A55R	1.65205	0	2.00157	1.45323	2.29293	1.69774	1.77613	2.05987	1.16227	1.74853	0.280546	low
TCGA-53-7626	2.54521	1	0.786751	1.7504	2.0328	1.73238	1.77505	2.11864	1.32652	1.64073	1.00942	high
TCGA-95-7944	0.0575342	0	1.50645	1.76998	2.10459	1.98679	1.30409	1.81441	1.08307	1.6404	1.07386	high
TCGA-73-A9RS	0.931507	1	0.682092	1.97863	1.86008	1.6398	1.33193	1.97467	0.971758	1.70458	1.28761	high
TCGA-44-7667	1.52603	0	0.764485	1.59246	1.97806	1.52436	1.31303	1.59168	0.949653	1.61654	1.20767	high
TCGA-55-8301	1.46301	0	0.898965	1.49437	1.97127	1.7746	1.45617	1.76976	1.12747	1.73543	1.80655	high
TCGA-05-4415	0.249315	1	0.691173	1.82955	1.97475	2.05909	1.56071	1.43074	0.963456	1.59297	22.7368	high
TCGA-50-5931	1.18904	1	0.939311	2.40567	2.29534	1.93515	1.94224	1.87829	0.989192	1.81361	13.4707	high
TCGA-50-5930	0.772603	1	0.862469	1.37322	1.87837	1.69313	1.20442	1.42162	1.20188	1.5172	1.15606	high
TCGA-38-4627	3.14247	1	0.747058	1.02798	2.15551	1.87453	1.27069	1.69263	1.18279	1.78839	1.2787	high
TCGA-55-7903	1.55342	0	1.39754	1.35	1.88586	1.77683	1.42554	1.60111	1.12926	1.61571	1.24586	high
TCGA-55-8619	1.13973	0	0.84027	1.02352	2.00885	1.76547	1.37192	1.81154	1.08911	1.63064	0.807244	low
TCGA-50-5933	6.55616	1	0.728478	1.08516	1.76174	1.75883	1.32638	1.5407	1.05716	1.65245	2.57545	high
TCGA-64-5779	1.38904	0	1.02513	1.77945	1.82005	1.80167	1.31613	2.01565	1.23185	1.79519	0.898387	low
TCGA-05-4410	0	0	0.774305	0.845498	1.93789	1.85318	1.32813	1.54236	1.42411	1.59515	1.03915	high
TCGA-44-A47G	0.961644	0	0.805351	1.16793	1.9395	1.70529	1.51604	1.83861	1.29406	1.7074	0.895673	low
TCGA-97-8179	1.19178	0	1.23141	1.06836	2.28076	1.77166	1.53228	1.5919	1.28306	1.61224	0.713462	low
TCGA-78-7155	3.20822	1	2.22037	1.11066	1.87505	1.79923	1.3154	1.40131	1.05194	1.53243	0.609803	low
TCGA-49-4505	1.1726	1	0.825674	0.925186	2.18588	1.61246	1.75883	1.65622	1.21581	1.66425	1.22161	high
TCGA-97-8552	1.71507	0	0.971592	0.994171	2.1897	1.64465	1.39602	2.01016	1.20224	1.64711	0.196057	low
TCGA-MP-A4TJ	0.928767	1	1.0387	1.19274	1.94959	1.81498	1.47254	1.97353	1.15689	1.72984	0.844313	low
TCGA-55-A493	0.0767123	0	0.998466	1.37274	1.71539	1.68552	1.3848	1.71103	1.02602	1.81349	2.13197	high
TCGA-69-7973	0.630137	0	0.936752	1.58322	2.02533	1.61254	1.30187	1.69057	1.04579	1.59105	0.754904	low
TCGA-05-4430	2.08493	0	1.12078	1.0895	2.07618	1.6912	1.38306	1.56367	1.031	1.71601	1.16895	high
TCGA-95-8039	0.0739726	0	0.948398	1.11534	2.04305	1.75049	1.92065	1.73644	1.39848	1.69197	2.13323	high
TCGA-69-7764	1.13425	0	1.25701	1.27487	2.03091	1.97667	1.41321	1.4871	1.6206	1.72654	1.45798	high
TCGA-49-4506	2.73699	1	0.64677	1.56451	2.02549	1.80618	1.32038	1.45655	0.97522	1.55079	3.81344	high
TCGA-49-AAQV	1.85479	1	0.993976	1.16603	2.11303	1.59933	1.4175	1.65589	1.09271	1.79242	0.88621	low
TCGA-62-A46P	1.6274	1	0.737565	0.997897	2.13474	1.58119	1.63359	1.74886	1.13717	1.62968	0.84703	low
TCGA-49-6761	0.969863	0	1.24648	0.919101	1.71467	1.59389	1.45445	1.47198	1.13932	1.53406	0.938544	low
TCGA-44-3919	0.520548	0	1.26674	1.37299	1.94782	1.63284	1.72486	1.68627	1.11776	1.65442	1.54173	high
TCGA-69-7980	1.12603	0	2.79086	1.52224	1.94176	1.98542	1.36552	1.65184	1.19562	1.70984	0.482707	low
TCGA-86-8074	0.0657534	0	1.65191	1.49615	2.04381	1.69732	1.31609	1.73926	1.1708	1.65056	0.353026	low
TCGA-38-4631	0.969863	1	0.632272	2.39676	1.81688	1.53626	1.24521	1.75676	0.989491	1.58851	1.54055	high
TCGA-38-4626	7.10959	0	0.791618	0.864162	1.98876	1.75043	1.42218	1.78589	1.68779	1.59451	0.289319	low
TCGA-55-A57B	1.49589	0	1.28824	1.19079	1.97752	2.00341	1.90716	1.98853	1.54758	1.83587	1.96905	high
TCGA-69-7979	0.243836	0	1.33227	1.42945	2.09531	1.53317	1.44686	1.90222	1.30726	1.72347	0.210027	low
TCGA-44-A4SS	1.13699	0	1.17338	1.08023	1.77751	1.70461	1.17767	1.86996	1.08919	1.96134	0.664817	low
TCGA-MN-A4N5	0.230137	0	1.5607	1.43279	1.87884	1.76029	1.52224	1.99941	1.24175	1.80688	0.563592	low
TCGA-99-8028	3.06301	0	1.87161	1.08777	2.11986	1.90183	1.4967	1.83378	1.11273	1.64646	0.489569	low
TCGA-55-7910	2.84932	0	1.17874	2.13768	2.01524	1.5351	1.2618	1.97527	1.01996	1.55898	0.291947	low
TCGA-91-6828	0.884932	0	0.90115	1.11529	1.85162	1.62085	1.32066	1.64467	1.10731	1.58196	0.751149	low
TCGA-91-6849	0.0958904	0	0.746831	0.74517	2.17774	1.69801	1.48354	1.51274	1.12933	1.53982	1.05614	high
TCGA-MP-A4TH	1.22192	0	0.976341	1.24908	1.94868	1.7966	1.43589	1.86012	1.32742	1.55019	0.570188	low
TCGA-44-7669	1.5726	1	0.913178	1.95618	2.00517	1.5956	1.64185	1.71063	1.0626	1.60351	2.13593	high
TCGA-95-7043	0.00547945	0	1.00229	0.953788	2.12938	1.61911	1.70192	1.87865	1.0114	1.57351	0.668886	low
TCGA-J2-A4AG	1.36986	0	0.805785	0.766719	1.85856	1.61982	1.51689	1.64288	1.26254	1.5172	0.695283	low
TCGA-86-7955	1.39178	0	0.806502	1.79263	1.77453	1.6846	1.4839	1.55022	1.4831	1.7888	2.67945	high
TCGA-78-7158	0.490411	1	1.13646	1.267	2.08455	1.60175	1.47658	1.87921	2.21863	1.94237	0.100308	low
TCGA-05-5425	2.41644	0	1.23008	1.02679	2.22327	1.85601	1.17911	1.51632	1.17036	1.57143	0.568148	low
TCGA-97-8175	1.50959	0	1.30394	0.908839	1.97432	1.8072	1.18927	1.72214	1.09563	2.14231	1.16943	high
TCGA-86-6562	1.03014	1	0.874961	1.13671	1.79238	1.59656	1.49493	1.50496	1.20538	1.77707	2.11739	high
TCGA-55-8090	1.63836	1	0.855176	1.15447	1.86845	1.60448	1.48345	1.88342	1.104	2.19876	1.97276	high
TCGA-55-7911	1.47123	0	1.53937	1.52825	1.89379	1.98941	1.47009	2.03935	1.37738	1.64472	0.578434	low
TCGA-55-8507	1.14521	0	0.757921	1.62389	1.89826	1.59291	1.31664	1.73245	1.1586	1.60919	0.818382	low
TCGA-93-8067	0.509589	0	1.18615	1.27494	1.87601	1.58739	1.27722	1.53052	1.03935	1.62807	0.812802	low
TCGA-55-8205	1.6411	0	0.791275	1.28327	1.81448	1.69212	1.32611	1.76838	1.17956	1.72843	1.07312	high
TCGA-05-4390	3.08493	0	0.763192	1.88222	2.06253	1.52056	1.18885	1.5927	0.998137	1.56517	0.8054	low
TCGA-86-8668	1.1589	0	1.03016	1.21034	1.87914	1.77556	1.78119	1.77052	1.54023	1.7251	1.51843	high
TCGA-62-8398	1.21644	1	0.736815	1.94154	1.93421	2.02474	1.34427	1.64733	1.036	1.69103	7.85352	high
TCGA-55-8513	2.16712	0	1.09652	0.984095	2.03734	1.79627	1.47669	1.95678	1.48908	1.60374	0.263916	low
TCGA-83-5908	2.25753	0	2.47682	1.64442	1.85619	1.63878	1.33847	1.62735	1.01543	1.97257	0.608619	low
TCGA-50-5045	5.95616	1	0.947867	1.2366	2.19336	1.87959	1.57809	1.68201	1.21537	1.82481	2.57743	high
TCGA-91-6836	1.14247	0	0.936739	2.06361	2.09928	1.50136	1.15474	1.49448	0.978365	1.7746	1.26324	high
TCGA-55-A491	1.71507	0	1.63483	1.5309	1.78407	1.54755	1.38612	1.68815	1.03853	1.77075	0.690926	low
TCGA-93-7347	0.813699	0	0.861427	1.22673	1.9249	1.8018	1.59967	1.66243	1.23284	1.65313	2.39845	high
TCGA-MP-A4T9	3.46575	1	1.09607	1.09279	2.13235	1.80908	1.72222	1.91352	1.29776	1.83222	1.1694	high
TCGA-55-8091	1.64384	0	1.25736	1.34883	2.07426	1.73872	1.67604	1.83486	1.29898	1.83145	1.11713	high
TCGA-97-7547	5.38356	0	0.783702	0.611529	1.63805	1.58343	1.14791	1.66916	1.19586	1.79593	0.548691	low
TCGA-62-A46R	4.72603	1	0.964858	1.3277	1.94389	1.88175	1.46388	1.88949	1.18539	1.57947	1.0913	high
TCGA-49-4490	1.05479	1	0.843084	0.680307	2.11432	1.71433	1.72945	1.53925	1.16691	1.55664	1.72054	high
TCGA-62-A46Y	1.13425	1	1.28655	1.2476	2.14258	1.77121	1.68834	1.99653	1.19019	1.61516	0.552536	low
TCGA-35-4123	0.49863	0	2.08075	1.24968	2.159	1.70756	1.43596	1.56489	1.35056	1.77863	0.330753	low
TCGA-97-A4M5	1.73699	0	0.959732	1.02388	1.97096	1.94626	1.50912	1.7776	1.055	1.70431	2.51314	high
TCGA-35-4122	0.616438	0	0.922694	0.943918	2.21248	1.75736	1.25332	1.50495	1.13625	1.68506	0.889041	low
TCGA-55-A48Z	1.78356	0	2.23637	1.58406	1.97153	1.60088	1.63228	1.87754	1.12736	2.02122	0.547553	low
TCGA-NJ-A4YF	5.92055	0	0.947771	1.33575	2.06065	1.50798	1.38827	1.67786	1.01212	1.67443	0.677499	low
TCGA-NJ-A4YQ	2.4274	0	1.18114	1.83929	1.94213	1.93817	1.43577	1.77852	1.3635	1.62006	1.48872	high
TCGA-55-6981	3.77808	1	0.821343	0.706681	1.89018	1.5974	1.40805	1.53012	1.1843	1.76882	1.1204	high
TCGA-MN-A4N1	2.26575	0	1.70126	1.29081	1.97353	1.64311	1.90124	1.88181	1.04813	1.65059	0.956884	low
TCGA-62-A471	3.4137	0	0.968344	1.68633	1.99493	1.88378	1.26603	1.56309	1.0567	1.67081	2.87075	high
TCGA-55-A4DF	1.20548	1	2.69775	2.06297	1.85368	1.74595	1.32372	1.92587	1.01023	2.06921	0.496394	low
TCGA-78-8648	3.31233	1	0.771632	1.15541	2.086	1.83827	1.39664	1.68445	1.34091	1.60039	0.975417	high
TCGA-67-6216	0.386301	0	0.716489	1.37497	1.82098	1.63322	1.38772	1.81382	1.22028	1.55752	0.703165	low
TCGA-69-7974	0.50411	0	0.914949	1.55558	1.79126	2.09038	1.41159	1.64741	1.39691	1.76687	5.29839	high
TCGA-93-A4JQ	1.4411	0	0.905076	1.70467	1.9205	1.7052	1.64535	2.01534	1.18257	2.08367	2.64043	high
TCGA-55-8207	2.67671	0	1.97186	0.884442	2.09354	2.02977	1.70944	1.55654	1.35103	1.6943	1.49085	high
TCGA-97-8176	1.28219	1	1.51542	2.04151	1.84028	1.76638	1.42108	1.82111	1.31958	1.66441	0.810154	low
TCGA-86-8280	1.92055	0	1.0456	1.25994	2.33994	1.87333	1.41786	1.60069	1.28024	1.74316	1.21816	high
TCGA-J2-8192	2.02466	0	0.852727	1.0499	2.03253	1.7468	1.53382	1.57798	1.20386	1.83243	2.44362	high
TCGA-MP-A4TK	1.59452	1	1.11038	1.26129	1.83994	1.85215	1.81906	1.91189	1.20773	1.79808	3.06839	high
TCGA-44-8119	0.780822	0	0.954115	1.64738	1.89564	1.57296	1.40067	1.66018	1.04785	1.67051	1.29717	high
TCGA-91-A4BD	1.65205	0	0.976534	1.22325	2.27703	1.80662	1.7492	1.91881	1.64489	1.63214	0.463083	low
TCGA-78-7149	2.99452	0	1.08464	0.911991	2.3704	1.81272	1.79252	1.58964	1.57597	1.6257	0.876975	low
TCGA-05-4249	4.1726	0	0.971044	0.834179	1.92736	1.58854	1.36738	1.6496	1.08962	1.60384	0.554354	low
TCGA-64-1679	4.61918	0	2.33743	0.877037	1.75301	1.59547	1.39149	1.51873	1.16049	1.6849	0.271846	low
TCGA-55-6987	5.85479	0	1.46776	1.33763	2.098	1.62329	1.58272	1.73331	1.19906	1.68466	0.555418	low
TCGA-MP-A4TF	0.920548	1	0.777465	1.72438	2.04029	1.82758	1.68008	1.84904	1.07623	2.06733	7.64243	high
TCGA-91-6848	0.613699	0	0.790206	1.73015	1.81604	1.67459	1.676	1.70526	1.04349	1.8786	6.60342	high
TCGA-86-8073	2.0274	0	2.19983	1.16613	1.82392	2.01838	1.55705	1.75766	1.06105	1.67304	1.28883	high
TCGA-64-5775	0.169863	1	0.668684	1.30428	2.07303	1.72759	1.42269	1.52776	0.96419	1.89941	4.78751	high
TCGA-55-6985	3.37808	0	1.22105	1.51713	1.90115	1.65318	1.65443	1.60916	1.16341	1.68935	2.068	high
TCGA-86-A456	1.10959	0	0.94744	0.83042	1.91263	1.72513	1.6511	1.87833	1.38599	1.54616	0.523322	low
TCGA-05-5429	0.753425	1	0.66945	1.29615	1.91633	1.65293	1.23944	1.55627	0.949675	1.67527	1.81373	high
TCGA-55-A48X	1.88767	0	1.81264	1.07749	2.01776	1.69154	1.76878	1.95475	1.2996	1.80105	0.411362	low
TCGA-86-8673	1.24658	0	1.55431	1.56107	2.20911	1.56733	1.48104	1.7319	1.09162	1.57538	0.32988	low
TCGA-86-8674	1.10959	0	0.718408	1.11405	2.18894	1.54111	1.17935	1.59008	1.11847	1.5172	0.318627	low
TCGA-49-6744	2.43836	0	0.698148	0.911355	1.93121	1.74031	1.448	1.70719	1.25052	1.62394	1.03583	high
TCGA-05-4382	1.66301	0	2.19105	1.06265	1.95299	1.83228	1.48309	1.73799	1.30761	1.70996	0.340585	low
TCGA-MP-A4TC	0.20274	1	0.930726	1.11477	1.80862	1.63725	1.47272	1.73958	1.05827	1.70529	1.27123	high
TCGA-05-4427	2.16712	0	0.833218	1.09344	1.80091	1.60558	1.25097	1.72219	1.04838	1.54486	0.57442	low
TCGA-55-6972	4.47123	1	1.68513	1.28123	2.33507	1.54099	2.22909	1.73011	1.93172	1.66449	0.308508	low
TCGA-55-6983	7.73425	0	0.781744	1.03414	2.07966	1.70165	1.35818	1.63189	1.11124	1.61436	0.925165	low
TCGA-73-4662	2.49863	0	1.93176	0.946162	1.98439	1.67573	1.54724	1.60154	1.10943	1.54045	0.408254	low
TCGA-44-7670	1.45479	0	0.70698	1.97979	2.09309	1.63497	1.40256	1.79155	1.05901	2.09526	3.17329	high
TCGA-49-AARO	10.2986	0	1.68186	1.28734	2.03619	1.78839	1.45416	1.88751	1.16431	1.78568	0.497723	low
TCGA-44-2657	1.09589	0	0.941009	1.31677	2.24241	1.74962	1.65946	1.97271	1.22461	1.63749	0.663716	low
TCGA-86-8075	1.31233	0	0.877153	1.23059	1.87996	1.74663	1.52585	1.58172	1.13639	1.71179	2.87541	high
TCGA-78-8660	0.879452	1	0.799896	1.53493	1.90289	1.50705	1.54208	1.64674	1.19796	1.94877	2.15657	high
TCGA-91-6840	1.01918	0	1.37705	1.61873	1.78626	1.91229	1.45619	1.76677	1.04789	1.80911	3.18698	high
TCGA-44-2665	1.09589	0	0.953865	1.07499	2.09163	1.82885	1.44973	1.8458	1.31899	1.92308	1.05693	high
TCGA-44-A479	1.07397	0	1.1393	1.57617	1.93824	1.56094	1.46943	2.03433	1.07232	1.83597	0.54009	low
TCGA-50-6590	3.52877	1	2.04895	1.72772	2.04775	1.55054	1.34006	1.63802	1.04639	1.86066	0.440546	low
TCGA-95-A4VN	1.51507	0	1.1529	1.1941	1.77515	1.59444	1.2999	1.52804	1.3906	1.5624	0.46662	low
TCGA-MP-A4TD	0.841096	1	1.13787	1.1528	2.05646	1.9152	1.36238	1.70525	1.32079	1.6895	0.947452	low
TCGA-55-7914	0.512329	1	1.04999	1.18191	1.85793	1.60315	1.3767	1.94718	1.30757	1.93487	0.453342	low
TCGA-97-A4M3	1.47945	0	0.715457	0.680442	1.90512	1.60513	1.37678	1.65275	1.26445	1.5172	0.443754	low
TCGA-73-4659	1.94795	1	0.777805	1.20467	2.10147	1.65553	1.32085	1.6532	1.17299	1.55699	0.609389	low
TCGA-38-4630	2.93973	1	2.38495	1.96915	1.91325	1.53167	2.57679	1.72634	1.19066	1.7885	4.59965	high
TCGA-78-7540	2.4137	0	0.686289	0.751707	1.77328	1.56604	1.29365	1.6808	1.00214	1.6015	0.715803	low
TCGA-J2-A4AD	1.50685	1	1.32354	1.67621	1.91916	1.91431	2.12596	1.88222	1.4746	1.7681	4.92022	high
TCGA-44-6778	3.0411	0	1.86524	1.55744	2.05542	1.76447	1.66186	1.71648	1.27737	1.73353	0.868947	low
TCGA-95-8494	0.230137	0	0.930185	1.52696	1.96309	1.971	1.87762	1.50707	1.148	1.61003	14.4512	high
TCGA-44-2656	1.59452	0	0.832109	1.04098	1.84459	1.68059	1.52824	1.60728	1.18641	1.65176	1.7078	high
TCGA-50-5055	5.0137	1	0.736834	1.289	2.21948	1.80188	1.37443	1.85359	1.18109	1.6141	0.688771	low
TCGA-62-A46V	6.02466	0	1.74619	1.83886	2.11911	1.93631	1.80259	1.80561	1.95925	1.67183	0.572066	low
TCGA-50-5072	0.684932	1	0.733541	2.58454	1.85978	1.89453	1.31871	1.44291	1.29943	1.63024	8.11579	high
TCGA-55-5899	2.54795	0	1.64843	1.9091	2.22106	1.64509	1.88898	1.71599	1.06787	1.59098	1.48044	high
TCGA-97-A4LX	1.68219	0	1.32714	1.29032	1.96172	1.67726	1.47622	1.94425	1.15066	1.68979	0.43152	low
TCGA-50-7109	0.843836	1	0.686807	1.29751	2.0129	1.63793	1.27535	1.60186	1.04101	1.58031	1.02794	high
TCGA-91-7771	1.34795	0	0.905873	0.927897	1.85487	1.7736	1.39858	1.62139	1.35875	1.67439	1.04751	high
TCGA-97-A4M1	1.64658	0	1.30743	0.853638	2.26807	1.82898	1.55207	2.02466	1.28773	1.63592	0.242273	low
TCGA-78-7536	0.668493	1	0.731688	2.25376	1.77771	1.50981	1.25113	1.70063	0.994269	1.85058	2.33473	high
TCGA-64-5778	2.53699	0	2.16172	1.65195	2.5867	1.73655	1.95306	1.99461	1.67229	1.65646	0.131133	low
TCGA-55-7283	1.66849	0	0.907144	0.775439	1.9521	1.53689	1.5496	1.57115	1.24727	1.52919	0.585665	low
TCGA-55-8302	1.30959	0	1.15912	1.44943	1.81103	1.85387	1.42829	1.6111	1.10195	1.68662	2.8637	high
TCGA-05-4384	1.16712	0	0.803771	1.07429	2.04476	1.70852	1.79508	1.8451	1.30593	1.62158	1.19461	high
TCGA-55-8511	1.51233	0	0.8882	1.24863	1.80776	1.64165	1.23759	1.65022	1.02531	1.62509	0.95879	high
TCGA-44-3398	0.693151	0	0.812385	0.925883	2.28404	1.90821	1.52215	1.77942	1.61157	1.74139	0.65913	low
TCGA-55-7913	1.53699	1	0.734642	1.8953	1.96059	1.61282	1.20008	1.53701	0.952109	1.64886	1.95395	high
TCGA-55-7727	0.326027	0	1.17049	1.48068	1.79099	1.78543	1.93501	1.75279	1.17676	1.66689	4.80347	high
TCGA-49-AAR2	6.09315	0	0.783247	2.3091	2.27333	1.69672	1.37179	1.88503	1.14599	1.52997	0.751746	low
TCGA-73-4675	0.109589	0	0.721994	1.48301	1.92158	1.55486	1.3985	1.6971	1.14093	1.62996	0.948356	low
TCGA-38-4628	4.08767	1	0.661575	0.982937	1.92849	1.53365	1.43226	1.4917	1.19675	1.63275	1.10514	high
TCGA-O1-A52J	4.92603	1	0.976492	1.32361	2.13799	2.02847	1.4099	1.99249	1.42925	1.74069	0.791359	low
TCGA-05-4396	0.830137	1	0.692154	1.4535	1.83422	1.88334	1.37971	1.80564	1.25468	1.555	1.57621	high
TCGA-05-5420	1.25205	0	0.825369	1.43006	2.20375	1.78003	1.32439	1.70467	1.19838	1.59365	0.805587	low
TCGA-67-3771	1.67123	0	1.26825	2.05294	1.91109	1.75204	1.46244	1.89273	1.09246	1.8303	1.7359	high
TCGA-78-7163	18.663	0	0.746695	0.81511	2.05733	1.4929	1.30109	1.6062	0.985461	1.64521	0.53087	low
TCGA-78-7160	1.85753	0	0.831149	1.21177	2.09613	1.74942	1.42017	1.68026	1.12158	1.63963	1.20494	high
TCGA-78-7143	13.5918	1	1.07972	1.69172	1.8122	1.55109	1.52722	1.65084	1.4233	1.68093	0.89516	low
TCGA-55-8087	1.26575	0	1.17428	1.07615	1.96082	1.71639	1.34359	2.12772	1.11537	1.60796	0.200299	low
TCGA-35-5375	0.723288	0	0.921287	1.77235	2.54461	1.74043	1.52231	1.56073	0.969253	1.77732	2.65431	high
TCGA-95-7562	0.238356	1	0.777813	2.0514	1.97845	1.54828	1.29049	1.52441	0.968861	2.19014	5.87114	high
TCGA-05-4426	2.16712	0	0.865701	1.67869	2.21352	1.88608	1.82587	1.70486	1.60996	1.71545	2.67363	high
TCGA-55-8508	1.69041	0	0.763648	1.18465	2.02148	1.55798	1.34128	1.79241	1.04368	1.70806	0.606657	low
TCGA-99-8025	2.90411	0	1.00015	1.01384	2.02307	1.78023	1.66002	1.58713	1.37163	1.59619	1.44528	high
TCGA-62-A46O	3.98356	1	1.54258	1.73785	1.83009	2.15335	1.26985	1.73677	1.19027	1.59796	2.12908	high
TCGA-62-8394	0.380822	1	2.19258	1.7853	1.98207	1.60876	1.4001	1.49538	1.47374	1.82836	0.385601	low
TCGA-44-6147	1.20822	0	2.00615	0.960002	1.79952	2.17075	1.37624	1.90085	1.58317	1.87776	0.59472	low
TCGA-64-1681	3.19726	1	0.897883	1.40931	2.0438	1.65046	1.41269	1.50619	1.1527	1.52595	1.1883	high
TCGA-49-AARR	13.6767	0	1.06433	1.00107	2.16384	2.09415	1.64411	2.15445	1.09707	1.65021	1.20361	high
TCGA-44-8120	0.712329	0	0.725205	0.93549	1.9812	2.08004	1.91525	1.66826	1.20098	1.6675	11.8667	high
TCGA-44-6776	5.30959	0	0.86938	0.767848	2.09639	1.67282	1.46925	1.54723	1.40217	1.58198	0.571489	low
TCGA-62-8402	4.10411	1	1.11146	1.70961	2.04621	1.55999	1.33182	2.03454	1.02655	1.77999	0.367858	low
TCGA-99-AA5R	1.80274	0	1.11193	1.13908	2.19854	1.97974	1.72183	2.16738	1.48523	1.63824	0.480041	low
TCGA-69-A59K	1.61918	0	1.464	1.49412	1.80659	1.52661	1.9013	1.90729	1.23502	1.74949	0.985427	high
TCGA-69-8254	1.12055	0	0.910503	1.06427	1.79079	1.91711	1.28664	1.7367	1.25774	1.66483	1.31098	high
TCGA-78-7150	1.82466	1	0.750549	1.9824	1.67806	1.83826	1.32934	1.5309	1.05191	1.60611	6.60463	high
TCGA-93-A4JN	1.96712	0	1.01401	2.03709	2.07666	1.91545	1.725	2.10179	1.19867	2.03216	4.10012	high
TCGA-55-7815	2.11781	0	0.793425	1.10977	1.95898	1.5637	1.21656	1.56736	1.11498	1.71935	0.736851	low
TCGA-49-4510	2.45479	1	0.790379	0.785538	2.46293	1.69094	1.29565	1.93918	1.05119	1.59099	0.182727	low
TCGA-44-7661	1.00274	0	0.916782	1.54798	1.86167	1.77267	1.46992	1.68088	1.15054	1.76285	2.79345	high
TCGA-55-6984	2.08219	1	0.773016	0.955363	1.86434	1.68935	1.30338	1.70157	1.00407	1.74196	1.26573	high
TCGA-55-8512	1.66301	1	0.944467	1.07742	2.07361	1.81919	1.59398	1.98514	1.57194	1.60249	0.362092	low
TCGA-50-6673	0.060274	1	0.730835	1.56054	1.95915	1.71354	1.55538	1.57374	1.14576	1.76904	4.14707	high
TCGA-67-3772	1.56986	0	0.797981	1.04905	2.28816	1.76056	1.50157	1.6406	1.17819	1.64334	1.10324	high
TCGA-86-7954	1.65753	0	1.00143	1.4599	1.91174	1.58505	1.27839	1.70417	1.21252	1.62891	0.500043	low
TCGA-05-4433	2	0	0.843808	1.11938	1.93486	1.59514	1.25666	1.78077	1.08963	1.61336	0.432896	low
TCGA-05-4432	2.08493	0	0.783668	1.93599	1.97127	1.5716	1.25654	1.56968	1.0261	1.6912	1.65542	high
TCGA-53-7624	2.85753	1	0.862191	2.27399	1.61987	1.69744	1.50995	1.66298	0.958367	1.63504	6.83098	high
TCGA-93-A4JP	1.58356	0	1.47193	1.53064	1.95165	2.10287	1.6006	2.00117	1.28548	1.76972	1.8922	high
TCGA-55-1594	3.2274	0	0.887744	1.746	2.17562	1.51894	1.31048	1.64972	1.0395	2.0221	1.42631	high
TCGA-78-7539	0.89589	0	0.862441	0.76227	2.21599	1.59661	1.3738	1.46938	1.11727	1.54735	0.576546	low
TCGA-55-7726	1.7863	0	0.795736	1.56961	1.83993	1.63829	1.43929	1.80485	1.09548	1.98434	2.42889	high
TCGA-55-6979	0.649315	1	2.01431	1.31021	1.92524	1.62039	1.37023	1.85044	1.19362	1.94532	0.278397	low
TCGA-86-8669	2.56986	0	0.775847	1.14006	1.86342	1.56627	1.34294	1.61959	1.0736	1.59395	0.881672	low
TCGA-44-3396	1.12603	0	0.824175	1.54136	2.0442	1.69224	1.23128	1.9026	1.20591	1.6554	0.427344	low
TCGA-L9-A5IP	0.158904	1	1.3823	1.23713	1.93355	1.56806	1.55746	1.51084	1.0174	1.64963	1.27379	high
TCGA-86-A4P7	1.13699	0	1.1135	1.21134	1.94511	1.78745	1.46389	1.8383	1.32967	1.58833	0.570122	low
TCGA-NJ-A4YI	0.0109589	1	2.08385	1.07884	1.94159	1.6306	1.42108	1.65945	1.41724	1.62664	0.151112	low
TCGA-78-7167	7.34521	1	0.762472	0.643306	1.95944	1.63051	1.61188	1.74337	1.64507	1.63735	0.374406	low
TCGA-50-6595	0.517808	1	0.859477	1.54089	1.90749	1.72752	1.20847	1.38264	0.972122	1.68739	3.2792	high
TCGA-64-1677	1.72055	1	1.26063	1.51558	2.32372	1.69718	1.38184	1.51931	0.971477	1.81785	1.53029	high
TCGA-97-8547	1.8	0	0.97955	1.5626	2.0594	1.80947	1.41982	1.7188	1.55522	1.91889	1.21132	high
TCGA-62-A470	3.27123	1	0.780826	1.19533	2.10444	1.73659	1.37858	1.92767	1.24422	1.54693	0.378882	low
TCGA-44-6148	0.991781	0	1.00412	0.927267	2.17416	2.04608	1.57718	2.02392	1.1039	1.87983	1.8835	high
TCGA-49-4514	4.65753	0	1.31422	1.74862	1.82523	1.94908	1.16573	1.58803	1.15646	1.54885	1.56716	high
TCGA-50-5946	1.87945	0	1.47398	1.56443	2.03759	1.77474	1.84764	1.75162	1.14796	1.69108	2.31862	high
TCGA-55-8614	1.46849	0	1.02937	1.45503	2.12201	1.74928	1.77276	1.77411	1.45172	1.9668	2.18608	high
TCGA-69-7978	0.367123	0	1.37973	1.28153	1.77923	1.68911	1.3002	1.71694	1.19436	1.73828	0.641085	low
TCGA-78-7154	1.62466	1	0.671798	1.39285	1.96882	1.64237	1.28444	1.50036	1.03636	1.64378	1.82622	high
TCGA-05-5423	0.413699	0	0.745466	1.00898	2.45188	1.70307	1.50005	1.53893	1.2324	1.56417	0.76983	low
TCGA-50-6591	0.326027	1	1.14322	2.28907	2.06602	2.00275	1.36654	1.75944	0.95397	1.64351	4.29724	high
TCGA-49-AAR3	5.1863	0	1.04124	1.66835	2.00079	1.71658	1.41006	1.74601	1.03319	1.81355	1.83763	high
TCGA-38-4632	3.71781	1	1.1234	1.28507	2.16527	1.54479	1.37119	1.5048	1.17998	1.5172	0.442279	low
TCGA-62-A46S	4.52877	1	1.11347	1.12723	1.87268	1.61808	1.35796	1.80341	1.02464	1.66104	0.570247	low
TCGA-99-8033	1.79726	1	0.974429	1.7295	2.1135	1.83989	1.64557	1.7352	1.23694	1.58061	2.15846	high
TCGA-05-4244	0	0	0.964465	1.19173	1.92687	1.78353	1.48866	1.58745	1.20703	1.69925	2.09394	high
TCGA-64-1680	3.08493	0	0.802325	0.90373	2.00714	1.60812	1.55046	1.80186	1.65637	1.56358	0.237628	low
TCGA-49-4512	2.47945	1	0.958111	1.76256	2.24371	1.72287	1.45012	1.64171	1.13625	1.72999	1.63698	high
TCGA-78-8640	17.8849	0	1.07619	1.09798	1.78693	1.62655	1.3916	1.7616	1.07652	1.73259	0.846609	low
TCGA-95-7947	0.109589	0	1.20934	1.42349	1.87493	1.80802	1.37303	1.619	1.13894	1.71072	1.775	high
TCGA-49-AAR4	2.40822	1	1.09293	1.40637	2.04123	1.87379	1.56428	2.10921	1.19572	1.80745	0.948488	low
TCGA-55-7907	0.939726	1	0.899765	1.06508	1.753	1.90778	1.83949	1.62852	1.26993	1.57336	5.71949	high
TCGA-86-8359	1.21644	1	0.770629	0.811576	1.64953	1.58425	1.24486	1.46172	1.0538	1.57698	1.17036	high
TCGA-50-5051	1.30959	1	0.750656	1.61489	1.99007	1.60858	1.3144	1.70139	1.10983	1.59722	0.87819	low
TCGA-49-4488	2.38082	1	1.45796	1.26405	1.9555	1.51745	1.26659	1.5447	1.28957	1.58783	0.243466	low
TCGA-86-7701	1.29863	0	0.926093	1.90743	2.00204	1.76305	1.26321	1.84235	1.05683	1.78146	1.39507	high
TCGA-05-4397	2.00274	1	0.727669	2.68918	2.39441	1.67651	1.28592	1.72277	1.46946	1.82852	1.03717	high
TCGA-NJ-A55O	0.0356164	0	0.892976	1.05366	2.0003	1.7947	1.42322	1.77966	1.26449	1.66237	0.833124	low
TCGA-91-6835	0.216438	0	0.98688	1.36786	1.98701	1.75895	1.58716	1.55084	1.22196	1.75336	3.00146	high
TCGA-55-7725	1.21096	0	1.13108	1.19919	1.99149	1.95603	1.60256	2.12748	1.99613	2.03742	0.43069	low
TCGA-55-8506	0.030137	0	0.97448	1.08923	1.67267	1.47009	1.42702	1.53623	1.06502	1.6117	1.045	high
TCGA-55-A494	1.31781	0	0.904054	1.26547	1.53385	1.51111	1.18381	1.91645	1.448	1.73043	0.226659	low
TCGA-67-4679	1.2274	0	1.09562	1.04699	2.13418	1.89501	1.57884	1.83395	1.33104	1.72506	0.99084	high
TCGA-78-7159	3.34521	0	0.759008	1.56012	2.07584	1.61651	1.34325	1.86104	0.981241	1.69536	0.822017	low
TCGA-55-6971	3.83562	0	0.779168	1.56596	1.90622	1.68463	1.44383	1.97341	1.22022	1.79209	0.945471	low
TCGA-95-A4VK	1.78356	0	1.51298	1.71105	1.85787	2.08455	1.56733	2.1739	1.7001	1.81789	0.678553	low
TCGA-73-4670	0.358904	0	0.656702	1.63444	2.32867	1.67097	1.27933	1.57601	1.01646	1.58903	1.14038	high
TCGA-50-5932	3.38356	1	1.53999	0.938124	2.07184	1.86797	1.20458	1.55242	1.00075	1.5763	0.645615	low
TCGA-49-4486	6.35068	1	0.716746	0.774081	2.25801	1.56197	1.77884	1.50192	1.68169	1.56664	0.542096	low
TCGA-78-8662	9.20822	1	1.63788	1.43399	2.27889	2.16956	1.46705	1.84961	1.69816	1.53387	0.392847	low
TCGA-MP-A4TA	2.60274	1	0.742423	2.18631	1.98844	1.92442	1.32812	1.83973	1.12177	1.77683	3.69033	high
TCGA-55-7284	0.665753	1	0.836102	1.3963	1.97448	1.69649	1.38106	1.73969	1.30985	1.67874	0.81284	low
TCGA-44-A4SU	1.12055	1	1.6514	1.45197	2.19032	1.68028	1.35374	2.00937	1.2956	1.95133	0.206301	low
TCGA-78-7161	0.589041	0	0.951571	1.10828	1.90661	1.58196	1.28935	1.65043	1.00937	1.54135	0.584096	low
TCGA-93-7348	0.347945	0	0.853453	0.669717	1.9855	1.61743	1.78214	1.73432	1.1913	1.58708	1.0143	high
TCGA-49-6745	1.43014	0	0.684482	1.09701	1.7425	1.70796	1.29871	1.55463	1.12658	1.71253	2.11623	high
TCGA-55-7227	2.60822	1	0.88737	1.22288	1.91371	1.77006	1.45618	1.74241	1.16589	1.58646	1.20507	high
TCGA-05-4424	2.50137	0	0.7824	1.22441	1.77496	1.70051	1.32931	1.56977	1.10681	1.72385	2.14822	high
TCGA-55-1596	5.65753	0	0.846823	2.05582	2.00532	1.66601	1.26007	1.35849	0.984389	1.54692	3.13558	high
TCGA-69-7761	0.509589	0	0.740038	1.60854	1.86413	1.82907	1.44766	1.86271	1.09783	1.69319	2.3698	high
TCGA-44-2662	1.31507	0	1.67502	0.834826	1.76413	2.1861	1.5261	1.67252	1.65082	1.89473	2.03438	high
TCGA-73-7499	1.9589	0	0.930691	2.01634	2.44858	1.63535	1.31898	1.65731	1.06337	1.79143	1.03841	high
TCGA-55-8505	1.20548	0	0.736053	1.93125	1.84241	1.88789	1.34131	1.82579	1.16869	1.88729	4.05719	high
TCGA-86-8671	2.29863	0	0.875224	1.4031	2.04322	1.81361	1.47957	1.87881	1.18206	1.64251	1.08168	high
TCGA-95-7948	0.364384	0	0.931487	1.39995	2.19574	1.51373	1.31554	2.21688	1.23415	1.59772	0.0731003	low
TCGA-50-5044	1.70959	1	0.915681	1.8105	2.1609	1.61058	1.59035	1.55362	1.05765	1.79811	3.19916	high
TCGA-91-6831	0.849315	0	0.73992	2.52499	2.17472	1.63088	1.3994	1.79277	1.0386	1.76688	2.19661	high
TCGA-86-8672	0.0520548	1	0.869893	1.17174	2.06804	1.70723	1.19551	1.8552	1.21057	1.63406	0.313609	low
TCGA-50-6594	1.0137	1	2.12357	2.06543	1.87016	1.50796	1.65399	1.56264	1.04207	1.84319	1.46581	high
TCGA-86-7714	1.71233	1	0.812193	1.14682	1.6278	1.89841	1.50935	1.72796	1.3768	1.66349	2.56453	high
TCGA-97-7553	5.12329	0	1.42422	1.30384	2.04002	1.85105	1.60299	1.82056	1.51436	1.61561	0.534425	low
TCGA-05-4422	1	0	0.780928	1.3422	2.11567	1.94116	1.24848	1.83052	1.43112	1.67597	0.692128	low
TCGA-55-6975	0.323288	1	0.740012	1.68178	1.89996	1.89154	1.33573	1.6327	1.05044	1.79312	5.33299	high
TCGA-49-AAR9	0.712329	1	0.966611	1.34778	1.84751	1.7549	1.5722	1.55046	0.96374	1.9148	7.44719	high
TCGA-05-4417	1.24658	0	0.816243	1.131	2.01963	1.61504	1.26685	1.65847	1.09972	1.56356	0.540434	low
TCGA-05-4395	0	1	0.656674	1.50027	1.83197	1.72731	1.21502	1.71336	1.11202	1.76165	1.6703	high
TCGA-97-A4M7	1.72329	0	1.03597	1.16375	2.01333	1.92394	1.51235	1.92235	1.30339	1.8192	1.25127	high
TCGA-55-7576	1.83562	0	1.45924	1.35618	1.76972	1.61741	1.31268	1.60994	1.29025	1.71679	0.55266	low
TCGA-64-5781	3.29315	0	0.665092	1.68825	2.20463	1.88025	1.59522	1.53395	1.07622	1.64554	6.5961	high
TCGA-L9-A50W	1.21096	1	0.940509	1.31499	2.16862	1.81607	1.55314	2.07436	1.23385	1.67816	0.56848	low
TCGA-86-6851	0.490411	0	1.68836	1.38357	1.88967	1.69805	1.61508	1.68681	1.22967	1.62321	0.785093	low
TCGA-05-4389	3.75068	0	0.944411	1.4036	2.06913	1.53878	1.16822	1.6755	1.04567	1.61269	0.382792	low
TCGA-97-7546	3.52055	0	0.949408	1.22481	1.98351	1.74976	1.79723	1.7331	1.16552	1.60631	2.37643	high
TCGA-55-7570	2.25753	0	0.779183	2.03173	2.0256	1.53956	1.78345	1.86171	0.992899	1.55099	2.05397	high
TCGA-67-3770	1.67123	0	0.769917	1.1283	2.52003	1.92679	1.53366	1.61573	1.36294	1.5927	1.14518	high
TCGA-50-5936	0.70411	1	0.886619	2.01616	1.9464	2.14758	1.34154	1.44354	1.13656	1.62615	12.9707	high
TCGA-86-8281	0	0	0.856061	0.713336	2.19918	1.67648	1.37822	1.58972	1.25253	1.60027	0.476125	low
TCGA-MP-A4T8	0.441096	1	0.780379	0.873894	1.75226	1.61927	1.37113	1.58307	1.07078	1.64464	1.29925	high
TCGA-55-A492	1.63288	0	0.734616	0.957642	2.38061	1.57553	1.85687	1.86211	1.71291	1.5172	0.219067	low
TCGA-50-8460	2.27123	0	0.93719	1.27286	2.05904	1.69532	1.55609	1.70235	1.32828	1.67919	0.979131	high
TCGA-NJ-A55A	0.0219178	0	1.10321	1.36775	2.16473	1.93831	1.70264	1.98873	1.13995	1.7238	1.72926	high
TCGA-55-8097	1.30411	0	1.25461	1.03752	1.96286	1.67091	1.47699	2.01933	1.17366	1.64258	0.273958	low
TCGA-55-A490	0.271233	1	1.2425	0.897051	1.71943	1.52556	1.13787	1.52179	1.18468	1.55279	0.285655	low
TCGA-86-7711	1.72603	0	0.755514	1.20763	1.99941	1.75487	1.56387	1.4632	2.06718	1.55969	0.605481	low
TCGA-50-5942	2.41918	0	0.876075	1.01366	1.89629	1.7444	1.38548	1.92932	1.46685	1.80655	0.455749	low
TCGA-69-8453	1.50685	0	0.776204	1.27971	2.01269	1.7579	1.48859	1.83395	1.33926	1.69417	0.917269	low

## Sheet: Table2
Supplement Table2 The genes of encoding E3-ubiquitin ligase
SIAH2
DTX1
UBE3A
SIAH1
FBW1A
MDM2
MDM4
FBW1B
RO52
CBL
VHL
SKP2
FZR
NEDD4
CBLB
SOCS1
ARRS
SMUF2
PRKN2
CHIP
SMUF1
UBE3C
CDC20
XIAP
FBXW7
TRI18
UBR5
AMFR2
CHFR
CNOT4
ITCH
HAKAI
RNF12
BIRC2
TRAF2
BRCA1
PJA1
M3K1
RN19A
RAD18
MIB1
RNF41
SYVN1
NED4L
BIRC3
RFPLA
MARH8
CIP1
RFWD2
EP300
NOSIP
PIAS2
R144B
RFFL
RNF5
PELI3
HECW2
FANCL
MYLIP
RNF6
MYCB2
ZNRF1
KEAP1
ARI1
RN111
RAG1
HECW1
MALT1
MARH1
MARH2
MARH4
DET1
UHRF2
UBE4B
CDCA3
RNF4
LNX1
WWP1
WWP2
RNF34
FBX32
RN216
TRAF6
FBX7
LRSM1
TNAP3
RN123
SOCS5
TRI63
FBXW2
TRI23
ZN363
MKRN1
TRI33
MIB2
TRI37
SPOP
ASB3
NHLC1
WSB1
SH3R1
TRI25
VPS18
GAN
NIPA
HUWE1
HOIL1
BRE1A
BRE1B
RN167
BMI1
RING1
ZSWM2
DDB2
MSL2
RING2
RN19B
RN138
BIRC7
ERCC8
FBX33
TRI32
DTL
MARH5
PELI1
KLH17
RNF31
FBX4
E4F1
RN128
SHPRH
SOCS3
ASB9
MARH9
MGRN1
RACK1
TRI13
PIAS4
RN125
RN115
PDLI2
FBXL5
KLHL9
PZRN3
MARHB
ARI2
IRAK1
IRAK4
HACE1
TRI41
SOCS2
RNF8
KLH13
TOPRS
RC3H1
HECD3
TRI11
RBX1
RN182
TRIM5
RNF43
VPRBP
RN180
FBXW5
MARH7
CISH
HERC5
FBXW8
TRIPC
TRI22
TRIM2
TRI17
TRI36
HLTF
RNF25
TRI31
FBX3
RBBP6
RN135
BRAP
KLHL8
ASB2
FBX34
MUL1
FBSP1
MARH6
PEX12
FBX6
BACD1
BACD2
DTX3L
CIKS
TIF1A
KLH21
TTC3
PJA2

## Sheet: Table3
Supplement Table3 The difference of EMT-related gene relative expression
Gene	conMean	treatMean	logFC	pValue
TPM4	56.9873	71.6714	0.330757	2.8e-07
PPIB	142.025	153.541	0.11248	0.0274091
WIPF1	8.36799	8.19611	-0.0299425	0.453175
MXRA5	11.5301	13.929	0.272685	0.0774549
GPX7	6.61868	8.86282	0.421223	0.000185449
EFEMP2	8.85761	8.95928	0.0164651	0.864359
CTHRC1	29.7933	44.7767	0.587757	3.38e-06
EDIL3	8.57589	11.0915	0.371092	0.257844
FSTL3	14.3499	18.9077	0.397932	0.0170947
OXTR	0.791295	0.926872	0.228154	0.257844
NTM	3.01108	3.35329	0.155297	0.43479
LAMA1	0.215988	0.768291	1.8307	0.0440746
CDH2	1.33901	2.07049	0.628807	0.0102257
THBS2	26.5156	34.7256	0.389156	0.00635568
PFN2	22.0201	33.8148	0.618831	1.89e-06
LOXL1	7.15873	8.20809	0.197343	0.294793
COL7A1	1.7866	3.40058	0.928562	0.00310613
FAP	2.61703	3.37222	0.365768	0.0145033
SFRP4	18.5334	18.4405	-0.00724593	0.665429
COL5A3	2.67933	3.24329	0.275583	0.0963327
ABI3BP	4.38075	3.59609	-0.28475	6.69e-06
PRSS2	30.8563	18.4597	-0.741186	1
ELN	21.7877	15.2501	-0.514695	7.98e-07
LRRC15	3.894	5.35823	0.460504	0.0208029
IL32	27.4185	29.7516	0.117819	0.472767
FBLN2	15.0307	15.4884	0.0432839	0.755018
MAGEE1	1.30918	1.22405	-0.0970018	0.209459
TPM1	12.6992	13.6081	0.0997297	0.255201
SPOCK1	1.4968	3.20458	1.09826	9.27e-10
GLIPR1	3.63052	4.0816	0.168958	0.253887
CALU	52.6149	67.446	0.35826	1.18e-07
NID2	1.97273	2.53759	0.36326	0.0261961
ECM2	2.80928	2.57378	-0.126309	0.0757768
GREM1	2.63185	4.50735	0.776202	1.93e-06
ANPEP	10.0073	18.7931	0.909151	0.276592
DPYSL3	26.2755	31.4803	0.260735	0.182253
SFRP1	1.51519	2.7781	0.874599	0.237483
COPA	54.5056	57.1956	0.0694978	0.30896
VEGFC	3.25375	5.67112	0.801533	5.72e-05
PLOD3	15.1195	17.5204	0.21263	0.00164372
CALD1	18.2755	20.8776	0.19205	0.0317918
PCOLCE2	2.60353	3.58686	0.462254	0.0242642
SLIT3	3.80573	2.91129	-0.386517	3.4e-06
FERMT2	6.17399	6.91364	0.163243	0.0910271
MATN2	3.96455	3.51715	-0.172751	0.0254825
BASP1	33.5163	47.8208	0.512777	0.558139
CRLF1	45.6571	42.147	-0.115412	0.015308
SERPINE2	2.95458	3.60524	0.28714	0.25284
ACTA2	59.8706	67.9022	0.18161	0.0463767
COL12A1	8.82418	14.0996	0.676119	1.24e-06
VIM	160.32	182.647	0.188104	0.446747
P3H1	5.86392	6.83675	0.221445	0.000353049
FMOD	24.6818	23.5097	-0.0701868	0.747365
PDLIM4	6.35247	6.78755	0.0955735	0.529488
PCOLCE	19.9265	23.9406	0.264774	0.150832
NNMT	59.0213	63.3755	0.102688	0.0814516
MGP	100.416	83.655	-0.263469	2.43e-05
FBN2	0.262016	0.833479	1.66949	0.03245
PTHLH	1.48638	2.57126	0.790676	6.71e-05
FOXC2	0.33598	0.480427	0.515941	0.120071
MFAP5	2.24178	2.6192	0.224481	0.000129416
SNTB1	14.0017	11.1615	-0.327071	0.000854151
MATN3	4.18835	4.1649	-0.00810126	0.706205
SGCB	6.59392	7.5583	0.196925	0.0403086
COL8A2	5.82182	6.96344	0.258328	0.621161
LOXL2	6.48409	13.6003	1.06866	2.65e-09

## Sheet: Table4
Supplement Table4 The difference of hypoxia-related gene relative expression
Gene	conMean	treatMean	logFC	pValue
PCK1	0.53166	0.649199	0.288159	0.882901
PHKG1	0.496165	0.495912	-0.000736009	0.0611818
HS3ST1	3.29088	3.0085	-0.129427	0.593835
NEDD4L	9.45648	7.07202	-0.419179	1.08385e-07
TMEM45A	3.34887	7.47775	1.15893	3.26959e-07
JMJD6	4.87923	5.15297	0.07875	0.230424
AMPD3	3.52069	3.31731	-0.0858449	0.169382
INHA	5.6458	7.61961	0.432541	0.802387
KDM3A	4.90165	5.09693	0.0563626	0.572206
LXN	11.7015	12.6464	0.112038	0.455456
CSRP2	1.72071	2.34199	0.444728	5.34946e-06
BRS3	0.00559731	0.0365561	2.70731	0.050893
TGFB3	4.68576	5.04083	0.105379	0.176536
LALBA	0.00178321	0.00358327	1.0068	0.0217607
IDS	19.4797	19.0344	-0.03336	0.41108
HOXB9	5.60426	5.27054	-0.0885741	0.0032087
WSB1	38.9403	33.007	-0.238488	0.00028942
STBD1	1.31598	1.31654	0.000616227	0.478617
BCAN	0.366035	0.521034	0.509396	0.853467
HK1	25.4521	25.9436	0.0275957	0.95024
PPARGC1A	0.927919	1.15429	0.314935	0.297124
HAS1	0.832433	0.742939	-0.164091	0.165501
TPST2	6.07221	6.02443	-0.0113968	0.479008
VHL	9.61417	9.00961	-0.0936982	0.0363664
NAGK	7.38678	7.16493	-0.0439922	0.366361
HEXA	8.56233	8.1749	-0.0668013	0.749754
NDST2	0.590564	0.500197	-0.239598	8.23639e-08
PGF	2.24492	2.11684	-0.0847513	0.00164727
ILVBL	9.6033	10.7628	0.164456	0.304782
KLHL24	8.30582	8.39369	0.0151826	0.38229
B4GALNT2	0.771491	1.16526	0.594936	0.109324
PLAC8	6.76891	5.05794	-0.420372	0.00243917
CHST3	4.4147	4.4076	-0.00232019	0.752145
NCAN	0.0084144	0.017119	1.02467	0.423708
KIF5A	0.295349	0.294499	-0.00415509	0.0740773
NDST1	13.579	12.8719	-0.0771519	0.00117405
